# Supplementary material
Source: Springer Nature journal article supplement (https://www.springermedizin.de/resource/supplementary/12885_2009_1851_MOESM3_ESM.pdf/9461010)

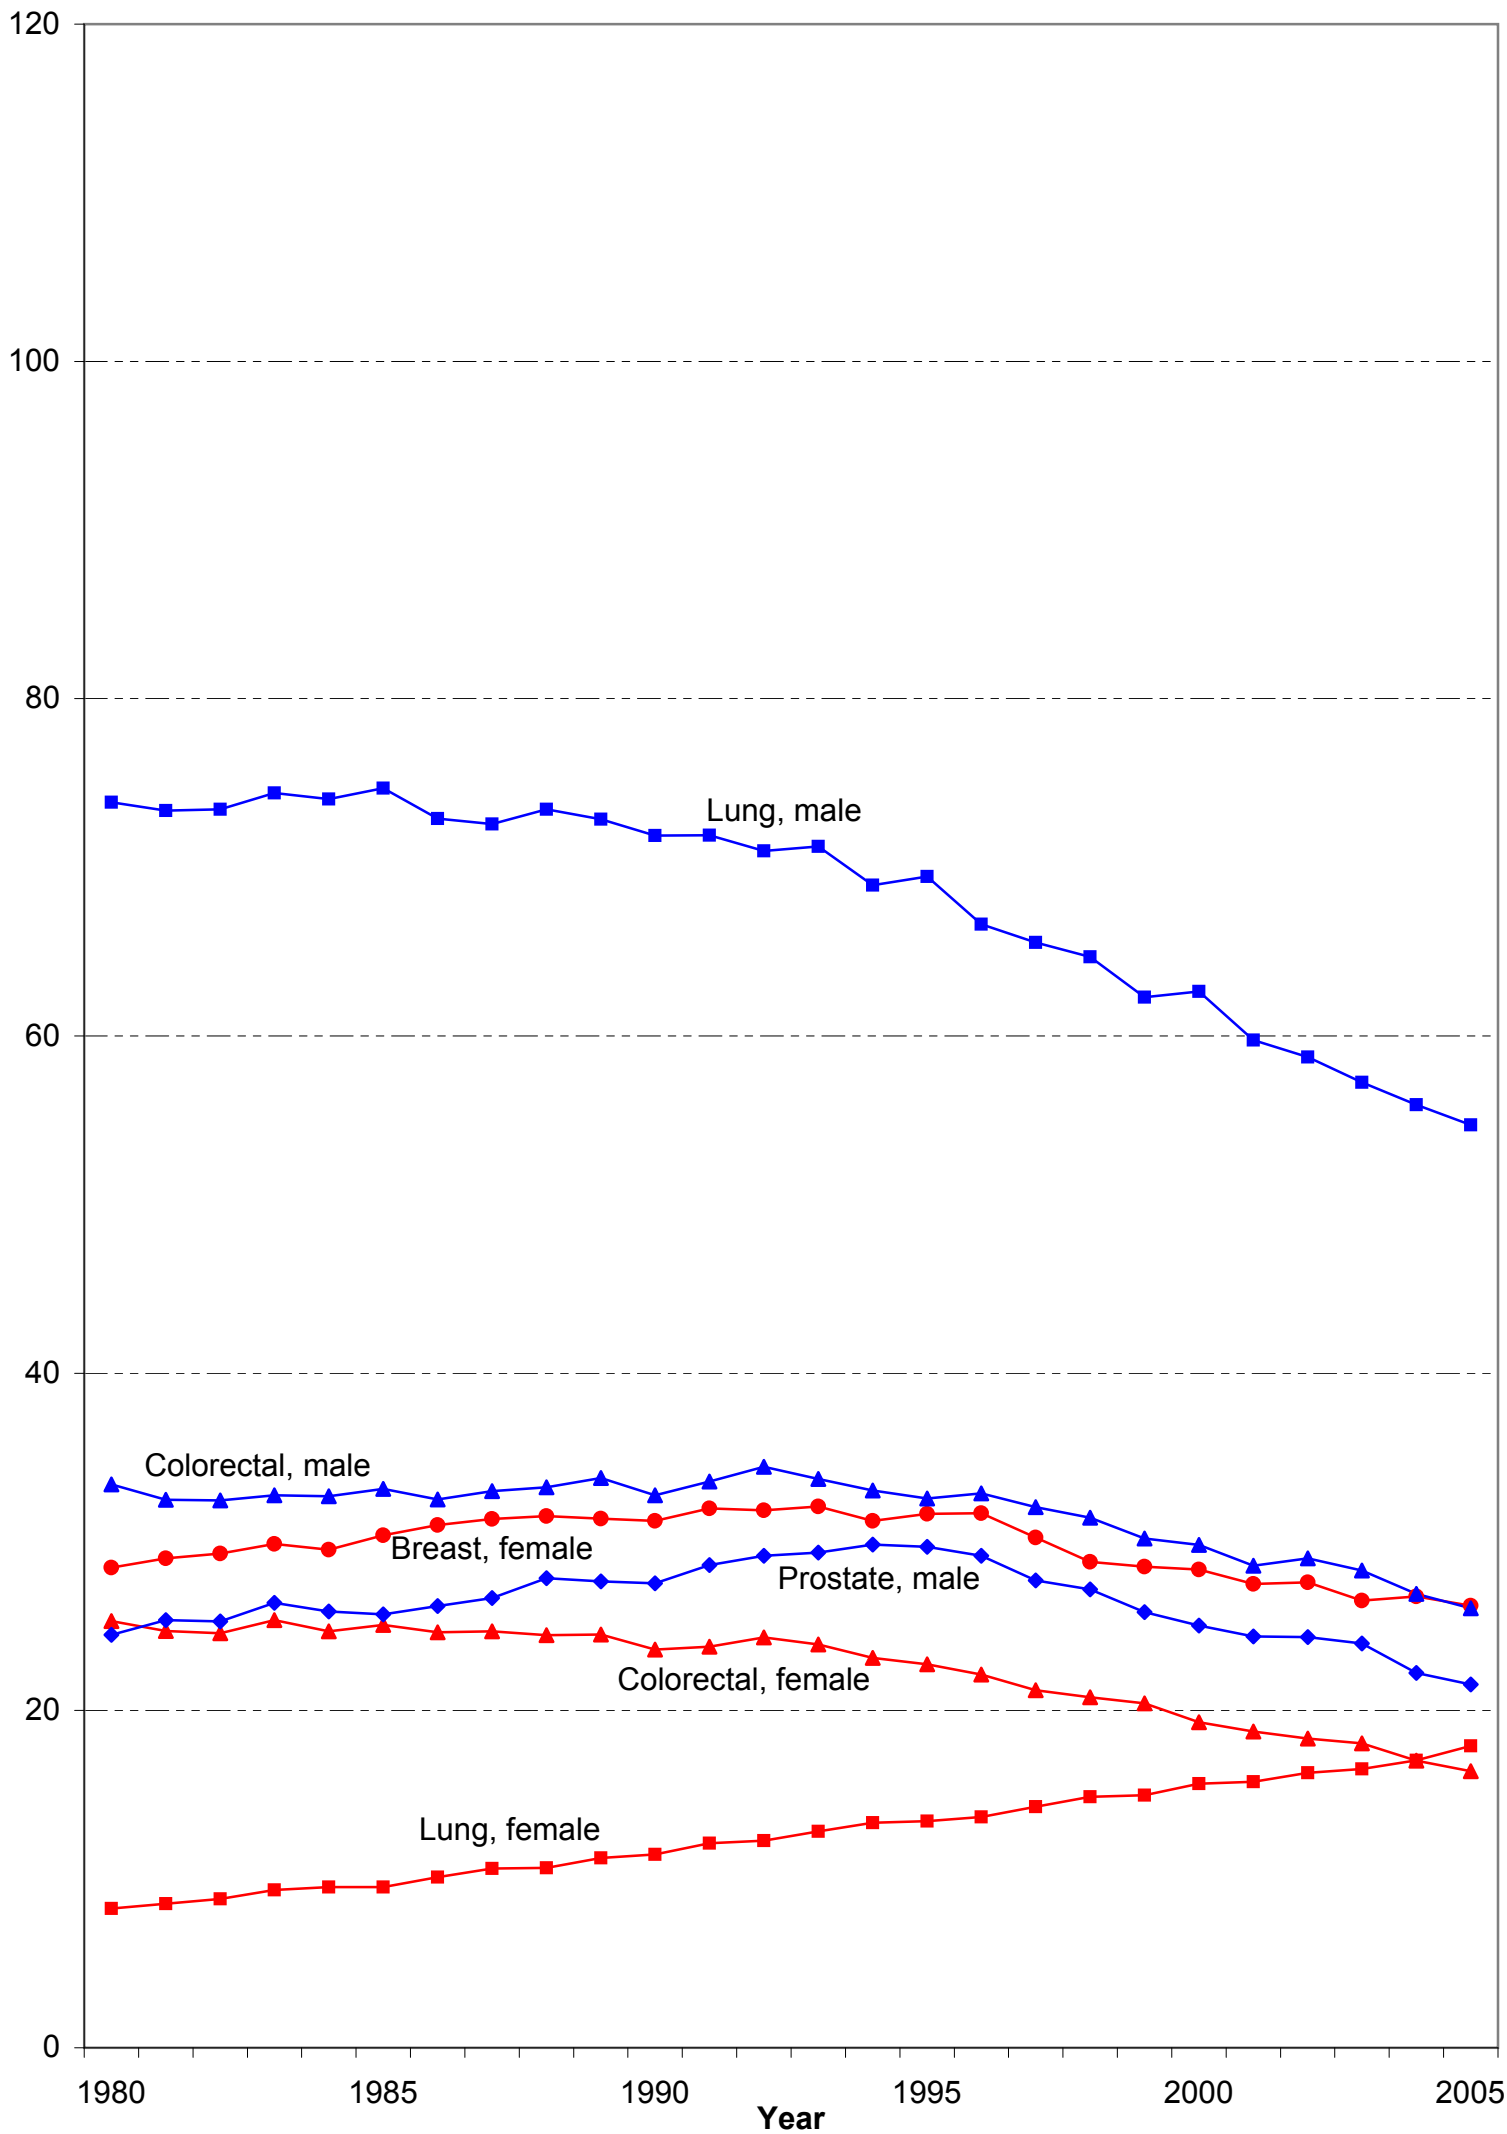

Supplement: MOESM3 [file 9461010]
